# A Logistic Curve in the SEIR Model and the Basic Reproduction Number of COVID-19 in Japan

Takesi Saito\* and Kazuyasu Shigemoto\*\*

\*Department of Physics and Astronomy, School of Science, Kwansei Gakuin University,  
Sanda 669-1337, Japan

\*\*Tezukayama University, Nara 631-8501, Japan

## Abstract

The SEIR model is one of modified models of SIR, especially taken into account of exposed people. SEIR equations can be solved numerically, but it is hard to obtain analytically. Here, we propose some approximate solutions of SEIR equations, one of which is related with the logistic formula in Biology. As the second aim, the SEIR model is applied to the 7th-wave of COVID-19 in Japan. The basic reproduction number ( $\alpha$ ) in the SEIR model is estimated for the Omicron wave. We make use of data of the removed number  $R(t)$  rather than that of the infective number, because the latter seems to be ambiguous. This analysis gives  $\alpha = 10$  with  $\gamma = 1$  and  $\sigma = 0.5$ .

**Keywords:** Variants of SARS-COV-2, SIR model, Epidemiology, Molecular biology

## 1. Introduction

The SIR model [1] in the theory of infection is powerful to analyze an epidemic about how it spreads and how it ends [3-16]. In this article we consider the SEIR model [2] which is one of modified models of SIR, especially taken into account of exposed people. SEIR equations can be solved numerically, but it is hard to obtain analytically. In order to analyze infections, analytic solutions are important. Here, therefore, we propose some approximate solutions of SEIR equations, one of which is related with the logistic formula in Biology.

As our second aim, the SEIR model is applied to the 7th-wave of Omicron-COVID-19 in

**NOTE:** This preprint reports new research that has not been certified by peer review and should not be used to guide clinical practice.

Japan. The basic reproduction number ( $\alpha$ ) in the SEIR model is estimated for the 7th - wave. We make use of data of the removed number  $R(t)$  rather than that of the infective number, because the latter seems to be ambiguous. According to this analysis we have  $\alpha=10$  with  $\gamma=1$  and  $\sigma=0.5$ , where  $\gamma$  and  $\sigma$  are the removed and the exposed ratios, respectively.

## 2. A logistic formula from the SEIR model

The sequential SEIR equations are given by

$$\begin{aligned} (1) \quad & dS(t)/dt = -\beta S(t)I(t) \\ (2) \quad & dE(t)/dt = \beta S(t)I(t) - \sigma E(t) \\ (3) \quad & dI(t)/dt = \sigma E(t) - \gamma I(t) \\ (4) \quad & dR(t)/dt = \gamma I(t) \end{aligned}$$

where  $S(t), E(t), I(t)$  and  $R(t)$  are numbers for susceptible, exposed, infectious and recovered, respectively,  $\alpha = \beta/\gamma$  the basic reproduction number,  $\sigma$  the exposed ratio and  $\gamma$  the removed ratio. Four numbers are normalized as

$$(5) \quad S(t) + E(t) + I(t) + R(t) = 1$$

The SEIR equations can be solved numerically, when parameters  $\beta, \gamma$  and  $\sigma$  are given. In Fig.1 we give four curves for  $S(t), E(t), I(t)$  and  $R(t)$  with  $\beta = 10$ ,  $\gamma = 1$  and  $\sigma = 0.5$ .

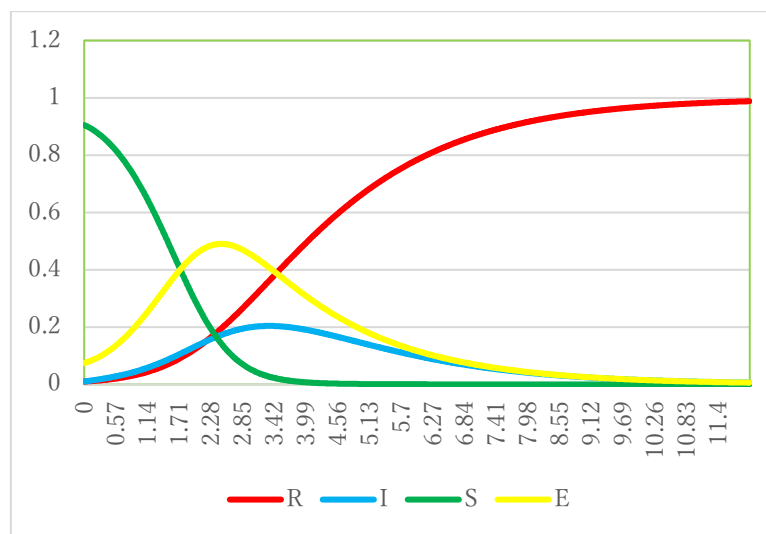

Fig.1. Four curves for  $S(t), E(t), I(t)$  and  $R(t)$  with  $\beta = 10$ ,  $\gamma = 1$  and  $\sigma = 0.5$ .

Here we propose some approximate solutions of SEIR equations, one of which is related with a logistic formula in Biology. From Eqs. (1) and (4) we get  $dS/dR = -\alpha S$ , which is integrated to be

$$(6) \quad S(t) = \exp [-\alpha R(t)]$$

Hence we have from Eq. (5)

$$(7) \quad E(t) + I(t) = 1 - R(t) - \exp [-\alpha R(t)]$$

Now, from Eq. (3)  $E(t)$  can be expressed as

$$(8) \quad E(t) = \frac{1}{\sigma} dI(t)/dt + \frac{\gamma}{\sigma} I(t)$$

Substituting  $I(t) = \gamma^{-1} dR(t)/dt$  of Eq. (4) into Eq. (8) above, we get

$$(9) \quad E(t) = \frac{1}{\gamma\sigma} d^2R(t)/dt^2 + \frac{1}{\sigma} dR(t)/dt$$

so that Eq. (7) reduces to the second order differential equation of  $R(t)$ .

$$(10) \quad d^2R(t)/dt^2 + (\gamma + \sigma) dR(t)/dt + \gamma\sigma [R(t) + \exp(-\alpha R(t)) - 1] = 0 \quad (\text{Exact})$$

In order to find approximate solution of the exact equation (10), we consider three cases:

Case 1:  $|d^2R(t)/dt^2| \ll |dR(t)/dt|$ ,  $R(t)$

In this case the first term in Eq. (10) can be neglected so that we have

$$(11) \quad dR(t)/dt + \frac{\gamma\sigma}{1+\sigma} [R(t) + \exp(-\alpha R(t)) - 1] = 0 \quad (\text{Case 1})$$

When  $\sigma \gg \gamma$ , we find that this equation reduces to the SIR equation:

$$(12) \quad dR(t)/dt + \gamma [R(t) + \exp(-\alpha R(t)) - 1] = 0 \quad (\text{SIR})$$

Case 2: When  $\alpha R(t) \ll 1$ , we can use the approximate formula  $\exp(-\alpha R) \cong 1 - \alpha R + \alpha^2 R^2/2$ , then Eq. (10) reduces to

$$(13) \quad d^2R(t)/dt^2 + (\gamma + \sigma) \frac{dR(t)}{dt} - \gamma\sigma(\alpha - 1)R(t) \left[ 1 - \frac{\alpha^2}{2(\alpha-1)}R(t) \right] = 0 \quad (\text{Case 2})$$

Case 3: A combination of Case 1 and Case 2 gives

$$(14) \quad dR(t)/dt - \frac{\gamma\sigma}{1+\sigma}(\alpha - 1)R(t) \left[ 1 - \frac{\alpha^2}{2(\alpha-1)}R(t) \right] = 0 \quad (\text{Case 3 : Logistic equation})$$

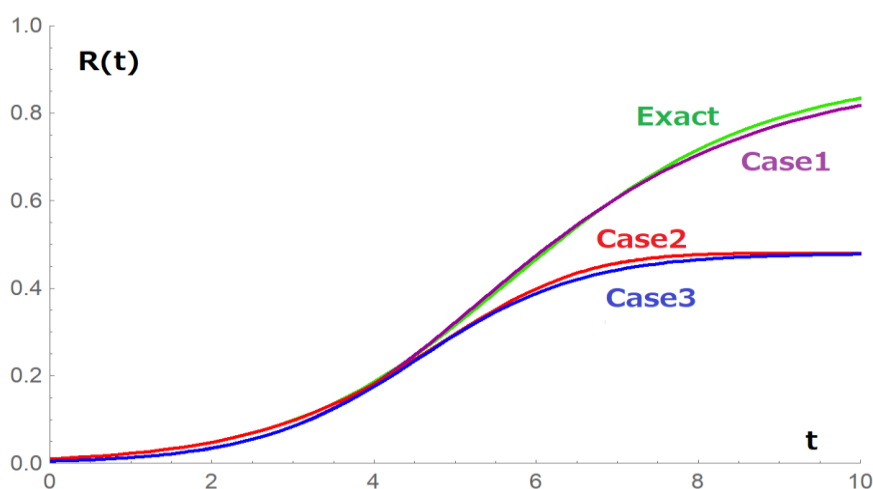

Fig. 2 Curves of approximate solutions for Cases 1, 2 and 3, against the Exact equation. The Case 3 is for the logistic equation.

In Fig. 2, we draw curves of approximate solutions for Cases 1, 2 and 3, against the Exact equation (10). Here we find that the contribution of the second order differential part,  $d^2R(t)/dt^2$ , into any case is very small. The last equation (14), Case 3, is nothing but the logistic equation.

### 3. The basic reproduction number of COVID-19 in Japan

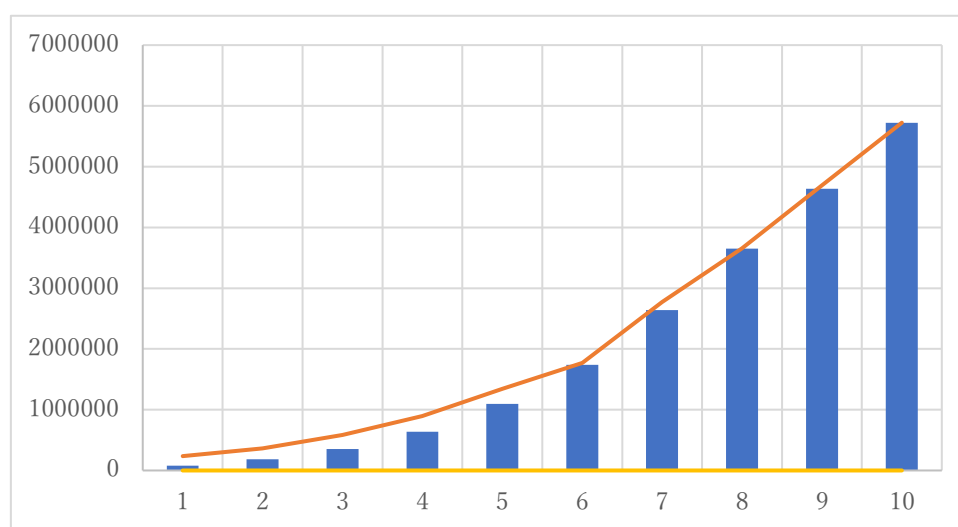

Fig. 3. The red line shows a curve of  $R(t)$  with  $\alpha = 10$ ,  $\gamma = 1$  and  $\sigma = 0.5$ . Blue bar charts stand for the 7th-wave data of  $R(t)$ .

|                       |                       |                        |                        |                        |                        |                        |                       |                        |                        |                        |
|-----------------------|-----------------------|------------------------|------------------------|------------------------|------------------------|------------------------|-----------------------|------------------------|------------------------|------------------------|
| 0                     | 1                     | 2                      | 3                      | 4                      | 5                      | 6                      | 7                     | 8                      | 9                      | 10                     |
| <a href="#">Jul.1</a> | <a href="#">Jul.6</a> | <a href="#">Jul.11</a> | <a href="#">Jul.16</a> | <a href="#">Jul.21</a> | <a href="#">Jul.26</a> | <a href="#">Jul.31</a> | <a href="#">Aug.5</a> | <a href="#">Aug.10</a> | <a href="#">Aug.15</a> | <a href="#">Aug.20</a> |

Table 1. The number above corresponds with the date below for each.

Let us estimate the basic reproduction number in the SEIR model for the 7th-wave of COVI-19 in Japan. We make use of data [17] of the removed number  $R(t)$  rather than that of the infective number, because the latter seems to be ambiguous. In Fig. 3, the red curve of  $R(t)$  for the 7th-wave is drawn with  $\alpha = 10$ ,  $\gamma = 1$  and  $\sigma = 0.5$  in the SEIR model. Blue bar charts stand for the 7th-wave data of  $R(t)$ . The number on the horizon axis corresponds with the date for each in Table 1.

In Fig. 3, we see that a coincidence between both curves is fairly well. So, we conclude that the basic reproduction number in the SEIR model is  $\alpha = 10$  with  $\gamma = 1$  and  $\sigma = 0.5$  for the 7th-wave of COVID-19 in Japan.

## 4. Conclusion

We have found some approximate solutions of SEIR equations. First, when  $\sigma \gg \gamma$  in Case 1, the SEIR equation reduces to the SIR equation (12). Approximate solutions are given by Case1, Case 2 and Case 3, and their curves are drawn in Fig. 2, where Case 3 is known to be the logistic formula in Biology. Here we find that the contribution of the second order differential part,  $d^2R(t)/dt^2$ , into any case is very small.

The logistic equation (14) can be rewritten as

$$(1) \quad dR(t)/dt = AR(t)[1 - R(t)/K], \quad A = \frac{\gamma\sigma(\alpha-1)}{\gamma+\sigma}, \quad K = \frac{2(\alpha-1)}{\alpha^2}$$

Then its explicit solution is easily obtained by

$$(2) \quad R(t) = \frac{K}{1+\exp(-z)}, \quad z = A(t - T), \quad T \text{ being a constant}$$

Hence, we have useful formulas

$$(3) \quad I(t) = \frac{1}{\gamma} dR(t)/dt = \frac{AK/(2\gamma)}{1+\cosh z}$$

from Eq. (4) in Sec. 2, and

$$(4) \quad E(t) = \frac{1}{\gamma\sigma} d^2R(t)/dt^2 + \frac{1}{\sigma} dR(t)/dt = \frac{AK/(2\sigma)}{1+\cosh z}$$

from Eq. (9) in Sec. 2, by neglecting the second order differential part,  $d^2R(t)/dt^2$ .

The second aim is the estimation of  $\alpha$ , the basic reproduction number in the SEIR model for the 7th-wave of Omicron COVID-19 in Japan. We have made use of data of the removed number  $R(t)$  rather than that of the infective number, because the latter seems to be ambiguous. We have obtained  $\alpha = 10$  with  $\gamma = 1$  and  $\sigma = 0.5$ .

## Acknowledgment

We would like to express our deep gratitude to Kokado A. for valuable discussions.

## References

- [1] W. O. Kermack and A. G. McKendrick, "A Contribution to the Mathematical Theory of Epidemics", Proceedings of the Royal Society A115 (1927), 700-721(1927).
- [2] M. Li, H. L. Smith and L. Wang, "Global Dynamics of an SEIR Epidemic Model with Vertical Transmission", SIAM J. Appl. Math. 62(1), 58-69(2001)
- [3] W. D. Murray, "Epidemic models and the dynamics of infectious diseases", Mathematical Biology 42, 610-650(1993).
- [4] H. Hethcote, "The Mathematics of Infectious Diseases", SIAM Review 42, 599-653 (2000).
- [5] M. J. Keeling and L. Danon, "Mathematical modelling of infectious diseases ", British Medical Bulletin 92, 33-42(2009).
- [6] S. Pathak, A. Maiti and G. P. Samanta, "Rich dynamics of an SIR epidemic model", Nonlinear Analysis: Modelling and Control 15, 71-81(2010).

- [7] T. Harko, F. S. N. Lobo, M. K. Mak, "Exact analytical solutions of the Susceptible-Infected-Recovered (SIR) epidemic model and of the SIR model with equal death and birth rates", *Applied Mathematics and Computation* 236, 184194(2014).
- [8] J. C. Miller, "Mathematical models of SIR disease spread with combined non-sexual and sexual transmission routes", *Infectious Disease Modelling* 2, 3555(2017).
- [9] R. Sameni, "Mathematical Modeling of Epidemic Diseases; A Case Study of the COVID19 Coronavirus", [arXiv:2003.11371 [q-bio.PE]](2017).
- [10] P-F. Verhulst, "Notice sur la loi que la population poursuit dans son accroissement", *Correspondance Mathmatique et Physique* 10, 113-121(1838).
- [11] T. Saito and K. Shigemoto, "A Logistic Curve in the SIR Model and Its Application to Deaths by COVID-19 in Japan", *medRxiv* 10.1101/2020.06.25.20139865. *European Journal of Applied Sciences* 10(5), 157-160(2022).
- [12] T. Saito, "An Application of Logistic Formula to Deaths by COVID-19 in Japan", *medRxiv* 10.1101/2020. 09.15.20195081.
- [13] A. Kokado and T. Saito, "A Logistic Formula and Its Application to Deaths by the Third Wave of COVID-19 in Japan", *medRxiv* 10.1101/2021.01.30.21250827,
- [14] T. Saito, "Variants of SARS-COV-2 and the Death Toll", *Integ. Mol. Bio. Biotechnol.* 1, 1-3(2021).
- [15] T. Saito, "Area Theorem of Infection Curves for Large Basic Reproduction Number", *European Journal of Applied Sciences* 10(1), 482-486(2022).
- [16] T. Saito, "Analyses of COVID-19 in Japan by the Mathematical Model of SIR", *EJAS*,10(3), 784-796(2022).
- [17] Data published from the Ministry of Health, Labor and Welfare of Japan.  
See for example, "Summary of the New Coronavirus Infection"(in Japanese), <https://news.yahoo.co.jp/pages/article/20200207>; "Status of the Domestic New Coronavirus Infection"(in Japanese), <https://toyokeizai.net/sp/visual/tko/covid19/>.
